# Supplementary material
Source: PubMed Central journal article supplement (PMC3805686)

**A**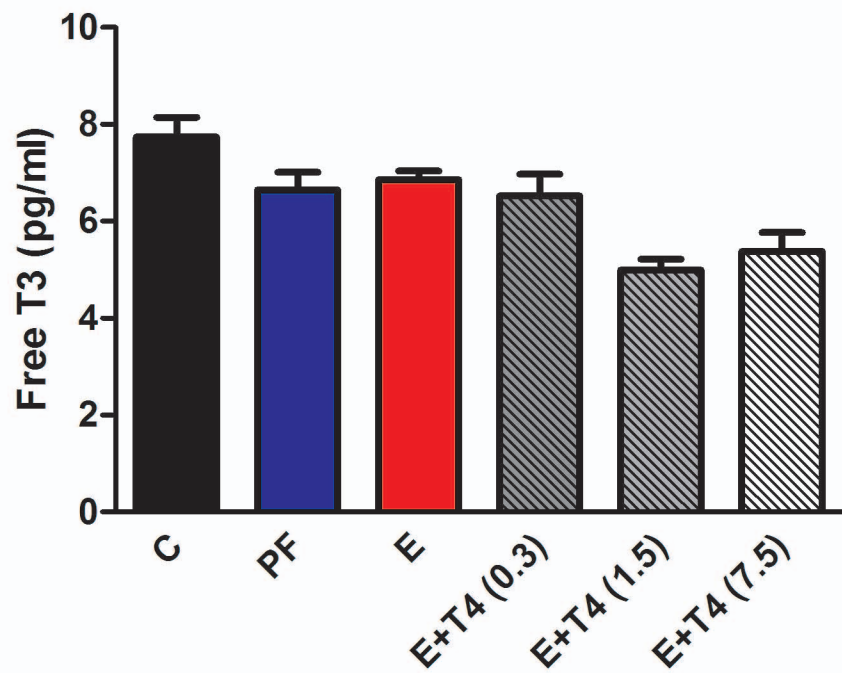**B**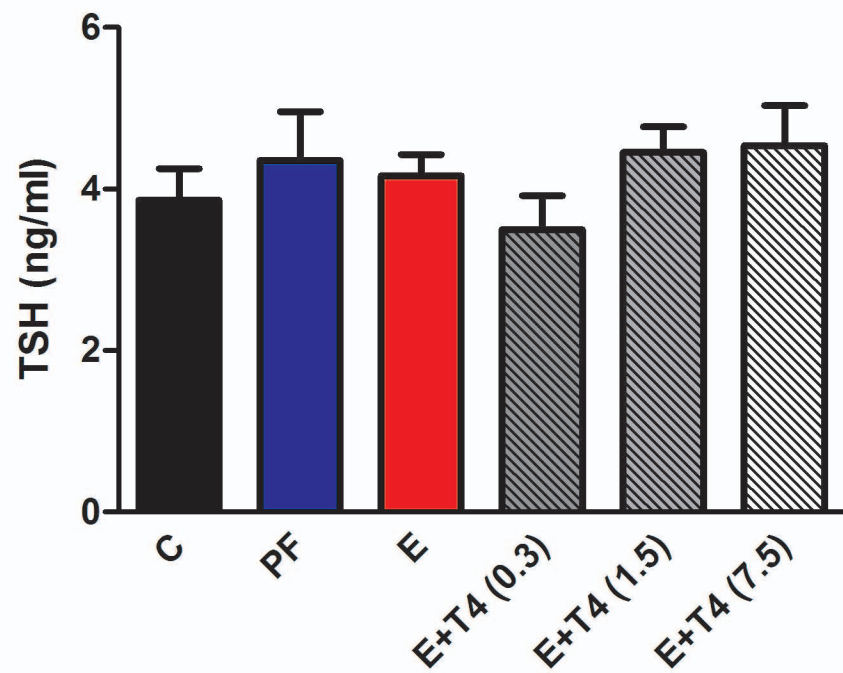

**A**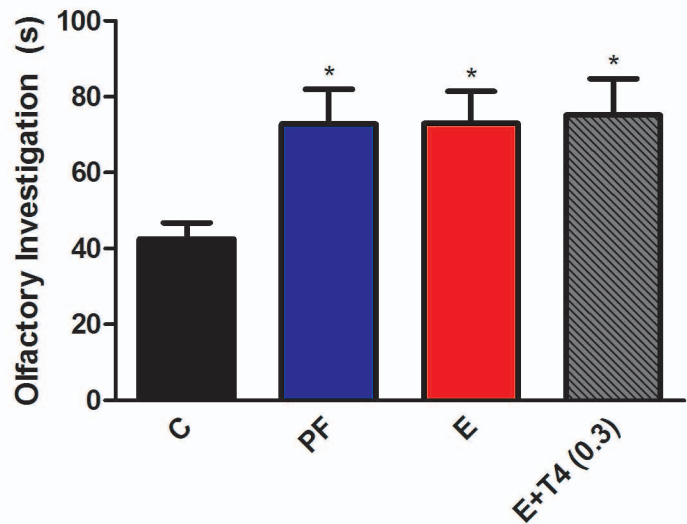**B**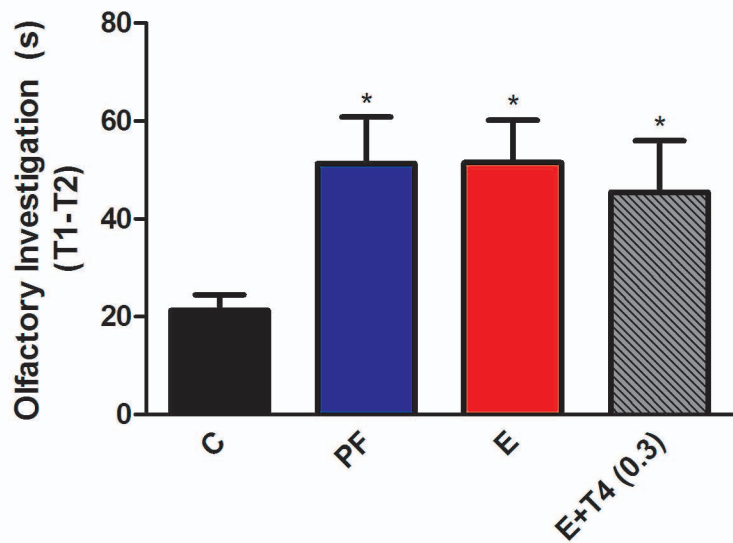

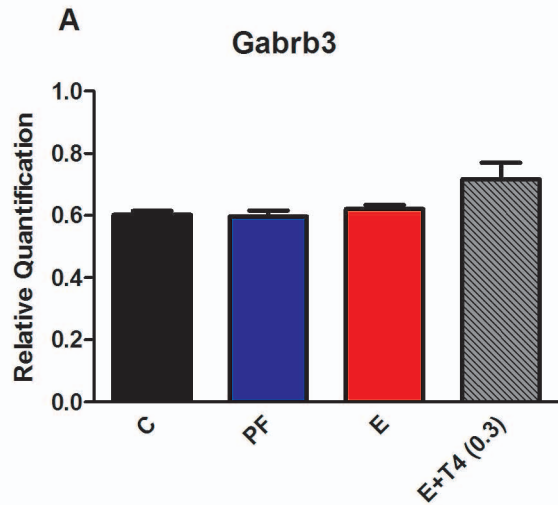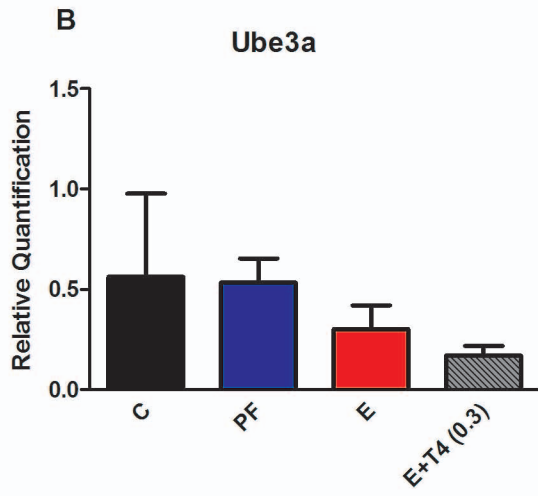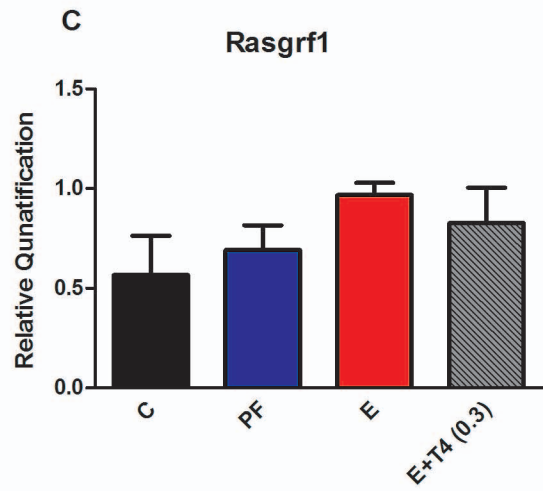

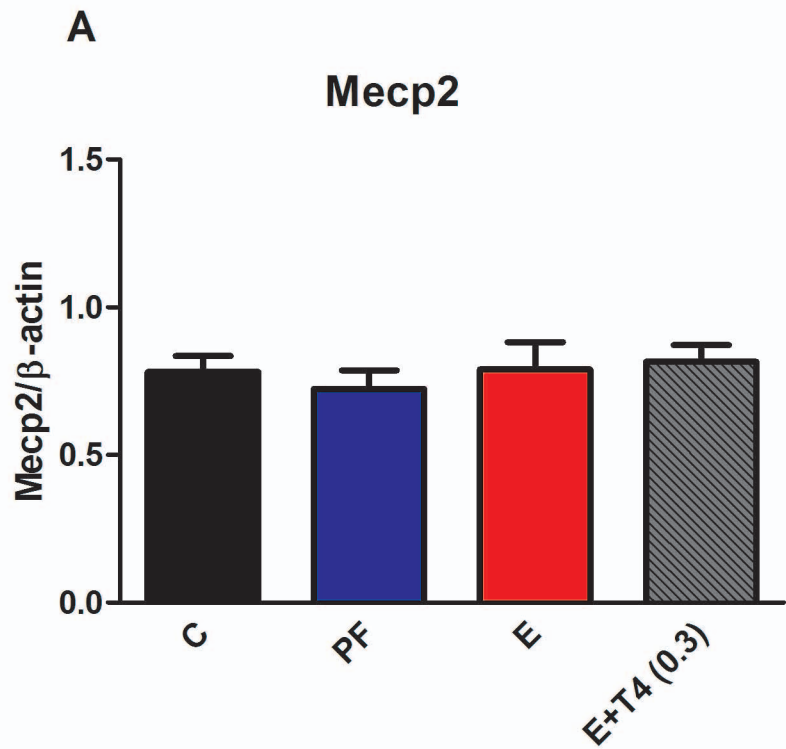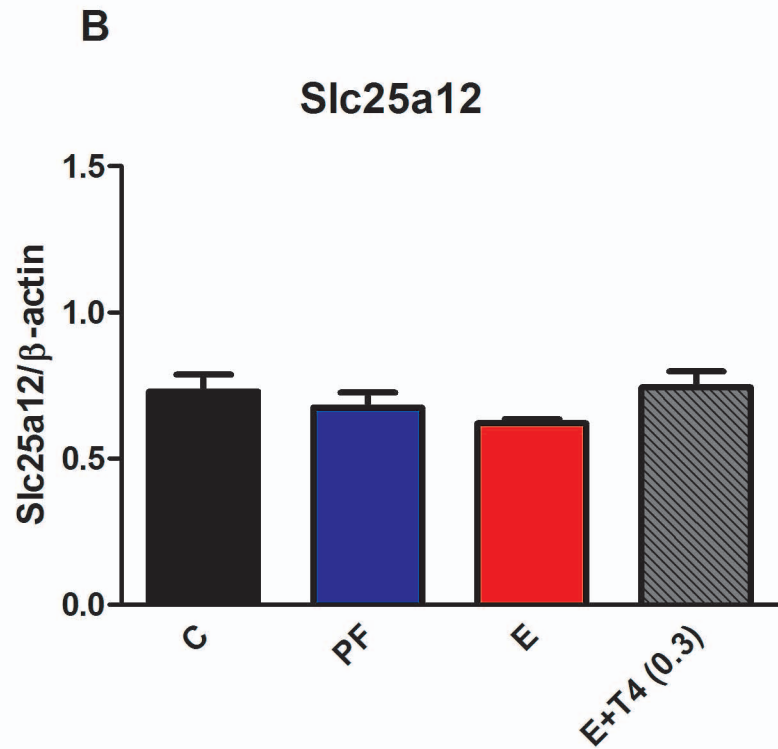

Supplement: NIHMS471411-supplement-Supp_Fig_S1-S4.pdf [file NIHMS471411-supplement-Supp_Fig_S1-S4.pdf]
